# Supplementary material for: Ultrasound imaging in patients with hip pain and suspected hip osteoarthritis: an inter-rater and intra-rater reliability study
Source: HighWire-hosted journal article supplement (doi:10.1136/bmjopen-2020-038643), 2020-11-01
Supplement: bmjopen-2020-038643supp001_data_supplement.pdf [file bmjopen-2020-038643supp001_data_supplement.pdf]

Supplementary file 1. Ultrasound findings in the hip, scoring systems and definitions used in the assessment.

| Ultrasound finding                                       | Scoring system<br><i>Binary, ordinal (semi-quantitatively) or numerical</i> | Definition                                                                                                                                                                                                    |
|----------------------------------------------------------|-----------------------------------------------------------------------------|---------------------------------------------------------------------------------------------------------------------------------------------------------------------------------------------------------------|
| Joint recess profile                                     | <i>(ordinal)</i><br>Concave<br>Straight<br>Convex                           | The course of the anterior joint recess along the anterior surface of the femoral neck                                                                                                                        |
| Bone-capsule distance (BCD) in the anterior joint recess | <i>(numerical)</i><br>Number in mm.                                         | Distance from the outer femoral cortex to the outer edge of the capsule. A second measure was made from the femoral cortex to the inside edge of the capsule                                                  |
| Overall joint effusion/synovitis                         | <i>(binary)</i><br>Present / absent                                         | Overall assessment of all the ultrasound findings related to effusion / synovitis                                                                                                                             |
| Femoral osteophytes                                      | <i>(ordinal)</i><br>None, mild, moderate or severe                          | Classified according to OMERACT guidelines                                                                                                                                                                    |
| Acetabular osteophytes                                   | <i>(ordinal)</i><br>None, mild, moderate or severe                          | Classified according to OMERACT guidelines                                                                                                                                                                    |
| Femoral head deformation                                 | <i>(ordinal)</i><br>None, mild, moderate or severe                          | Normal (round), mild (slightly flattened), moderate (very flattened), severe (no obvious contour or the femoral head can be defined)                                                                          |
| Femoral cartilage changes                                | <i>(ordinal)</i><br>None, mild, moderate or severe                          | Classified according to OMERACT guidelines                                                                                                                                                                    |
| Femoral cartilage thickness                              | <i>(numerical)</i><br>Number in mm.                                         | Anterior surface of femoral head, as close to labrum as possible.                                                                                                                                             |
| Labrum changes                                           | <i>(ordinal)</i><br>None, mild, moderate or severe                          | Normal (homogeneous echogenicity), mild (heterogeneous echogenicity and labrum poorly defined), moderate (definite pathology) and severe (pathology or degeneration to a degree where labrum was not defined) |
| Iliopsoas bursitis                                       | <i>(binary)</i><br>Present / absent                                         | Fluid associated with the iliopsoas tendon ventral to the hip joint                                                                                                                                           |
| Trochanter bursitis                                      | <i>(ordinal)</i><br>Present / absent                                        | Fluid in any bursa in the trochanter region                                                                                                                                                                   |

|            |                                             |                                                       |
|------------|---------------------------------------------|-------------------------------------------------------|
| OA grading | (ordinal)<br>None, mild, moderate or severe | The degree of hip OA based on the ultrasound findings |
|------------|---------------------------------------------|-------------------------------------------------------|
